# Supplementary material
Source: bioRxiv or medRxiv preprint supplement (https://medrxiv.org/highwire/filestream/86443/field_highwire_adjunct_files/2/2020.06.16.20133207-3.pdf)
Supplement: Supplementary file [file 2020.06.16.20133207-3.pdf]

### Appendix 3. List of excluded studies

#### Excluded studies from database search

| No. | Reference                                                                                                                                                                                                                                                                 | Reason for exclusion |
|-----|---------------------------------------------------------------------------------------------------------------------------------------------------------------------------------------------------------------------------------------------------------------------------|----------------------|
| 1.  | Ahmad, E. F., et al. (2001). "The effect of wearing the veil by Saudi ladies on the occurrence of respiratory diseases." <i>J Asthma</i> 38(5): 423-426.                                                                                                                  | Study type           |
| 2.  | Ahmad, I., et al. (2017). "Assessment of knowledge, practice and barrier in use of facemask among university students." <i>Pakistan Journal of Medical and Health Sciences</i> 11(4): 1657-1658.                                                                          | Reported outcomes    |
| 3.  | Aiello, A. E., et al. (2010). "A randomized intervention trial of mask use and hand hygiene to reduce seasonal influenza-like illness and influenza infections among young adults in a university setting." <i>International Journal of Infectious Diseases</i> 14: e320. | Duplicate            |
| 4.  | Aiello, A. E., et al. (2010). "Mask use, hand hygiene, and seasonal influenza-like illness among young adults: a randomized intervention trial." <i>J Infect Dis</i> 201(4): 491-498.                                                                                     | No extractable data  |
| 5.  | Akyuz, N., et al. (2014). "How and how much do endoscopy professionals protect themselves against infection?" <i>Int J Surg</i> 12(7): 720-724.                                                                                                                           | Reported outcomes    |
| 6.  | Albarrak, A. I., et al. (2019). "Middle East Respiratory Syndrome (MERS): Comparing the knowledge, attitude and practices of different health care workers." <i>J Infect Public Health</i> .                                                                              | Reported outcomes    |
| 7.  | AlGhamri, A. A., et al. (2013). "The effects of wearing respirators on human fine motor, visual, and cognitive performance." <i>Ergonomics</i> 56(5): 791-802.                                                                                                            | Intervention         |
| 8.  | Allsopp, J., et al. (1997). "Survey of the use of personal protective equipment and prevalence of work related symptoms among dental staff." <i>Occup Environ Med</i> 54(2): 125-134.                                                                                     | Reported outcomes    |
| 9.  | Alqahtani, A. S., et al. (2016). "Exploring barriers to and facilitators of preventive measures against infectious diseases among Australian Hajj pilgrims: cross-sectional studies before and after Hajj." <i>Int J Infect Dis</i> 47: 53-59.                            | No extractable data  |
| 10. | Alsarheed, M. (2011). "Children's Perception of Their Dentists." <i>Eur J Dent</i> 5(2): 186-190.                                                                                                                                                                         | Study type           |
| 11. | Aydin, O., et al. (24 April 2020). "Performance of fabrics for home-                                                                                                                                                                                                      | Reported             |

|     |                                                                                                                                                                                                                                                                                    |                            |
|-----|------------------------------------------------------------------------------------------------------------------------------------------------------------------------------------------------------------------------------------------------------------------------------------|----------------------------|
|     | made masks against spread of respiratory infection through droplets: a quantitative mechanistic study." PREPRINT (Version 1 - 2020.04.19.20071779), Available at: medRxiv: <a href="https://doi.org/10.1101/2020.04.19.20071779">https://doi.org/10.1101/2020.04.19.20071779</a> . | outcomes                   |
| 12. | Badin, A. (1969). "[The surgeon's fatigue and discomfort behind the mask]." <i>Gynaecologia</i> 167(5): 430-433.                                                                                                                                                                   | Study type                 |
| 13. | Bansal, S., et al. (2009). "Respirator physiological effects under simulated work conditions." <i>J Occup Environ Hyg</i> 6(4): 221-227.                                                                                                                                           | Intervention               |
| 14. | Beuvelet, M., et al. (2017). "Healthcare workers' perception towards the systematic use of mask during a seasonal influenza outbreak in a French University Hospital: A descriptive study." <i>Antimicrobial Resistance and Infection Control</i> 6.                               | Unable to access full text |
| 15. | Bhojrul, B., et al. (2019). "A review of non-glove personal protective equipment-related occupational dermatoses reported to EPIDERM between 1993 and 2013." <i>Contact Dermatitis</i> 80(4): 217-221.                                                                             | Study type                 |
| 16. | Bischoff, W., et al. (2017). "Evaluation of a novel powered air-purifying respirator (PAPR) vs. a N95 respirator mask for the protection against influenza in a human exposure model." <i>Open Forum Infectious Diseases</i> 4: S168.                                              | Reported outcomes          |
| 17. | Brandt, C., et al. (2011). "Attitudes of influenza-vaccinated health care workers toward masks to prevent nosocomial transmission of influenza." <i>Influenza Other Respir Viruses</i> 5(1): 61-66.                                                                                | Study type                 |
| 18. | Buitrago, F. (2010). "Hygienic measures and barriers are effective strategies to prevent the transmission of viral infections." <i>FMC Formacion Medica Continuada en Atencion Primaria</i> 17(5): 361.                                                                            | Study type                 |
| 19. | Caretti, D. M. and P. D. Gardner (1999). "Respirator fit factor performance while sweating." <i>American Industrial Hygiene Association Journal</i> 60(1): 84-88.                                                                                                                  | Intervention               |
| 20. | Chan, E. Y., et al. (2015). "Knowledge, attitudes, and practices of Hong Kong population towards human A/H7N9 influenza pandemic preparedness, China, 2014." <i>BMC Public Health</i> 15: 943.                                                                                     | Reported outcomes          |
| 21. | Chan, M. F., et al. (2008). "Investigating the knowledge, attitudes and practice patterns of operating room staff towards standard and transmission-based precautions: results of a cluster analysis." <i>J Clin Nurs</i> 17(8): 1051-1062.                                        | Reported outcomes          |
| 22. | Chan, M. T., et al. (2013). "Mask ventilation and dispersion of exhaled air." <i>Am J Respir Crit Care Med</i> 187(7): e12-14.                                                                                                                                                     | Study type                 |

|     |                                                                                                                                                                                                                                              |                   |
|-----|----------------------------------------------------------------------------------------------------------------------------------------------------------------------------------------------------------------------------------------------|-------------------|
| 23. | Cherrie, J. W., et al. (2019). "In-mask temperature and humidity can validate respirator wear-time and indicate lung health status." <i>J Expo Sci Environ Epidemiol</i> 29(4): 578-583.                                                     | Intervention      |
| 24. | Chung, P. K., et al. (2017). "The process by which perceived autonomy support predicts motivation, intention, and behavior for seasonal influenza prevention in Hong Kong older adults." <i>BMC Public Health</i> 18(1): 65.                 | Study type        |
| 25. | Coca, A., et al. (2017). "Physiological Evaluation of Personal Protective Ensembles Recommended for Use in West Africa." <i>Disaster Med Public Health Prep</i> 11(5): 580-586.                                                              | Intervention      |
| 26. | Collyer, S. and P. J. Davis (2006). "Effect of facemask use on respiratory patterns of women in speech and singing." <i>J Speech Lang Hear Res</i> 49(2): 412-423.                                                                           | Reported outcomes |
| 27. | Condon, B. J. and T. Sinha (2010). "Who is that masked person: the use of face masks on Mexico City public transportation during the Influenza A (H1N1) outbreak." <i>Health Policy</i> 95(1): 50-56.                                        | Reported outcomes |
| 28. | Davies, A., et al. (2013). "Testing the efficacy of homemade masks: would they protect in an influenza pandemic?" <i>Disaster Med Public Health Prep</i> 7(4): 413-418.                                                                      | Reported outcomes |
| 29. | Davis, P. J., et al. (2007). "A survey of Alberta physicians' use of and attitudes toward face masks and face shields in the operating room setting." <i>Am J Infect Control</i> 35(7): 455-459.                                             | Reported outcomes |
| 30. | Del Ferraro, S., et al. (2018). "Hot environment: Effects of a power assisted filtering device incorporating a full face mask on newton manikin thermophysiological response." <i>Occupational and Environmental Medicine</i> 75: A503-A504. | Study type        |
| 31. | Del Ferraro, S., et al. (2017). "Thermophysiological response of Newton manikin equipped with power-assisted filtering device incorporating a full-face mask in hot environment." <i>Int J Hyperthermia</i> 33(7): 717-723.                  | Population        |
| 32. | Deris, Z. Z., et al. (2010). "The prevalence of acute respiratory symptoms and role of protective measures among Malaysian Hajj pilgrims." <i>Journal of Travel Medicine</i> 17(2): 82-88.                                                   | Study type        |
| 33. | Derrick, J. L. and C. D. Gomersall (2005). "Protecting healthcare staff from severe acute respiratory syndrome: filtration capacity of multiple surgical masks." <i>J Hosp Infect</i> 59(4): 365-368.                                        | Reported outcomes |
| 34. | Ding, S., et al. (1998). "[Heat strain for personnel wearing three levels                                                                                                                                                                    | Intervention      |

|     |                                                                                                                                                                                                                                    |                   |
|-----|------------------------------------------------------------------------------------------------------------------------------------------------------------------------------------------------------------------------------------|-------------------|
|     | of protective ensembles at moderate and heavy workloads]." Wei Sheng Yan Jiu 27(6): 361-364.                                                                                                                                       |                   |
| 35. | DiLeo T, Roberge RJ, Kim JH. Effect of wearing an N95 filtering facepiece respirator on superomedial orbital infrared indirect brain temperature measurements. J Clin Monit Comput. 2017;31(1):67-73.                              | Reported outcomes |
| 36. | Dong, J. and Y. Chen (2010). "Impact of the bag exchange procedure on risk of peritonitis." Perit Dial Int 30(4): 440-447.                                                                                                         | Reported outcomes |
| 37. | Ellison, I. R. T. (2009). "Surgical masks or N95 respirators for the flu?" Medicine Today 10(12): 69-70.                                                                                                                           | Reported outcomes |
| 38. | Emanuel, R., et al. (2017). "A study of special care dental patient preference toward choice of mask and visor use by dental clinicians." Spec Care Dentist 37(4): 164-167.                                                        | Reported outcomes |
| 39. | Fabian, P., et al. (2011). "Influenza virus aerosols in human exhaled breath: Particle size, culturability, and effect of surgical masks." Epidemiology 22(1): S51.                                                                | Reported outcomes |
| 40. | Field, M. H., et al. (2020). "Hydrocolloid dressing strip over bridge of nose to relieve pain and pressure from Filtered Face Piece (FFP) masks during the coronavirus (COVID-19) pandemic." Ann R Coll Surg Engl 102(5): 394-396. | Study type        |
| 41. | Fierro, J. L., et al. (2015). "Barriers to the Use of PPE to Prevent Pertussis Exposures in a Pediatric Primary Care Network." J Pediatric Infect Dis Soc 4(1): 49-56.                                                             | Reported outcomes |
| 42. | Flury, D., et al. (2019). "Health-care associated Influenza Prevention Project (HAIP): First multicenter surveillance results (nosocomial influenza and prevention measures)." Antimicrobial Resistance and Infection Control 8.   | Reported outcomes |
| 43. | Fox, S. H. and A. B. DuBois (1993). "The effect of evaporative cooling of respiratory protective devices on skin temperature, thermal sensation, and comfort." Am Ind Hyg Assoc J 54(12): 705-710.                                 | Intervention      |
| 44. | Ganczak, M. and Z. Szych (2007). "Surgical nurses and compliance with personal protective equipment." J Hosp Infect 66(4): 346-351.                                                                                                | Reported outcomes |
| 45. | Gu, J., et al. (2015). "Preventive behaviors and mental distress in response to H1N1 among university students in Guangzhou, China." Asia Pac J Public Health 27(2): Np1867-1879.                                                  | Reported outcomes |
| 46. | Guo, Y. P., et al. (2008). "Evaluation on masks with exhaust valves and with exhaust holes from physiological and subjective responses." J                                                                                         | Intervention      |

|     |                                                                                                                                                                                                                                                                                                                            |                   |
|-----|----------------------------------------------------------------------------------------------------------------------------------------------------------------------------------------------------------------------------------------------------------------------------------------------------------------------------|-------------------|
|     | Physiol Anthropol 27(2): 93-102.                                                                                                                                                                                                                                                                                           |                   |
| 47. | Gwosdow, A. R., et al. (1989). "Effect of thermal conditions on the acceptability of respiratory protective devices on humans at rest." <i>Am Ind Hyg Assoc J</i> 50(4): 188-195.                                                                                                                                          | Intervention      |
| 48. | Hassaniazad, M., et al. (2016). "Preventive measures for Crimean-Congo hemorrhagic fever in healthcare workers; how high is the chance of transmission?" <i>Acta Medica Mediterranea</i> 32: 2017-1024.                                                                                                                    | Reported outcomes |
| 49. | Harber, P., et al. (1989). "Relationship of subjective tolerance of respirator loads to physiologic effects and psychophysical load sensitivity." <i>J Occup Med</i> 31(8): 681-686.                                                                                                                                       | Intervention      |
| 50. | Hardis, K. E., et al. (1983). "Correlation of qualitative and quantitative results from testing respirator fit." <i>Am Ind Hyg Assoc J</i> 44(2): 78-87.                                                                                                                                                                   | Intervention      |
| 51. | Hickey, J., et al. (2014). "Pandemic preparedness: perceptions of vulnerable migrants in Thailand towards WHO-recommended non-pharmaceutical interventions: a cross-sectional study." <i>BMC Public Health</i> 14: 665.                                                                                                    | Reported outcomes |
| 52. | Hines, S. E., et al. (2019). "User acceptance of reusable respirators in health care." <i>American Journal of Infection Control</i> 47(6): 648-655.                                                                                                                                                                        | Intervention      |
| 53. | Ho, R. C., et al. (2014). "Impact of 2013 south Asian haze crisis: study of physical and psychological symptoms and perceived dangerousness of pollution level." <i>BMC Psychiatry</i> 14: 81.                                                                                                                             | Reported outcomes |
| 54. | Huang, W. and L. Morawska (2019). "Face masks could raise pollution risks." <i>Nature</i> 574(7776): 29-30.                                                                                                                                                                                                                | Study type        |
| 55. | Huynh, TD (30 March 2020). "The more I fear about COVID-19, the more I wear medical masks: A survey on risk perception and medical masks uses." PREPRINT (Version 1 - 2020.03.26.20044388), Available at: medRxiv: <a href="https://doi.org/10.1101/2020.03.26.20044388">https://doi.org/10.1101/2020.03.26.20044388</a> . | Reported outcomes |
| 56. | Ioannidou, C., et al. (2010). "Promotion of hygiene measures to prevent pandemic influenza transmission in greek nursery schools: The teachers' perspectives." <i>Acta Paediatrica, International Journal of Paediatrics</i> 99: 88.                                                                                       | Reported outcomes |
| 57. | Jaeger, J. L., et al. (2011). "Transmission of 2009 pandemic influenza A (H1N1) virus among healthcare personnel-Southern California, 2009." <i>Infect Control Hosp Epidemiol</i> 32(12): 1149-1157.                                                                                                                       | Reported outcomes |
| 58. | James, R., et al. (1984). "Effects of respirators under heat/work conditions." <i>Am Ind Hyg Assoc J</i> 45(6): 399-404.                                                                                                                                                                                                   | Intervention      |

|     |                                                                                                                                                                                                                                                                                                                             |                   |
|-----|-----------------------------------------------------------------------------------------------------------------------------------------------------------------------------------------------------------------------------------------------------------------------------------------------------------------------------|-------------------|
| 59. | Jencsik, T., et al. (2017). "Influenza-related attitudes of healthcare workers at institutions for acute and chronic diseases." <i>Value in Health</i> 20(9): A791-A792.                                                                                                                                                    | Study type        |
| 60. | Johnson, A. T., et al. (2000). "Effect of external dead volume on performance while wearing a respirator." <i>Aihaj</i> 61(5): 678-684.                                                                                                                                                                                     | Intervention      |
| 61. | Johnson, A. T., et al. (2000). "Communication using a telephone while wearing a respirator." <i>Aihaj</i> 61(2): 264-267.                                                                                                                                                                                                   | Intervention      |
| 62. | Kawanami, S., et al. (2018). "Physiological effects of wearing powered airpurifying respirators with different blower system." <i>Occupational and Environmental Medicine</i> 75: A201.                                                                                                                                     | Intervention      |
| 63. | Kim, J. H., et al. (2015). "Effect of wearing an N95 respirator on infrared tympanic membrane temperature measurements." <i>J Clin Monit Comput</i> 29(6): 691-695.                                                                                                                                                         | Reported outcomes |
| 64. | Kishimoto, K., et al. (2016). "[Whether Visual Information Loss of Expression by Community Pharmacist Masks to Effect a Change in Feeling of Trust among Help-seeker?]." <i>Yakugaku Zasshi</i> 136(10): 1401-1413.                                                                                                         | Study type        |
| 65. | Krishna, S., et al. (2019). "The gloves are off: The state of personal protective equipment (PPE) use in contact, droplet, and standard precautions at a major teaching hospital." <i>Open Forum Infectious Diseases</i> 6: S429-S430.                                                                                      | Study type        |
| 66. | Kroo, L., et al. (29 April 2020). "Pneumask: Modified Full-Face Snorkel Masks as Reusable Personal Protective Equipment for Hospital Personnel." PREPRINT (Version 1 - 2020.04.24.20078907), Available at: medRxiv: <a href="https://doi.org/10.1101/2020.04.24.20078907">https://doi.org/10.1101/2020.04.24.20078907</a> . | Intervention      |
| 67. | Latheef, F., et al. (2015). "Personal protective equipment-associated dermatoses reported to EPIDERM: A 20-year review." <i>British Journal of Dermatology</i> 173: 172-173.                                                                                                                                                | Duplicate         |
| 68. | Lau, J. T., et al. (2003). "Monitoring community responses to the SARS epidemic in Hong Kong: from day 10 to day 62." <i>J Epidemiol Community Health</i> 57(11): 864-870.                                                                                                                                                  | Reported outcomes |
| 69. | Leung, N. H., et al. (06 March 2020). "Respiratory Virus Shedding in Exhaled Breath and Efficacy of Face Masks." PREPRINT (Version 1), Available at: Research Square [ <a href="https://doi.org/10.21203/rs.3.rs-16836/v1">+https://doi.org/10.21203/rs.3.rs-16836/v1</a> ],.                                               | Reported outcomes |
| 70. | Lee, H. P. and Y. Wang de (2011). "Objective assessment of increase in breathing resistance of N95 respirators on human subjects." <i>Ann</i>                                                                                                                                                                               | Reported outcomes |

|     |                                                                                                                                                                                                     |                   |
|-----|-----------------------------------------------------------------------------------------------------------------------------------------------------------------------------------------------------|-------------------|
|     | Occup Hyg 55(8): 917-921.                                                                                                                                                                           |                   |
| 71. | Lee, J. A., et al. (2017). "Compliance of personal protective equipment in a hospital." <i>Antimicrobial Resistance and Infection Control</i> 6.                                                    | Reported outcomes |
| 72. | Li, Y., et al. (2006). "Antimicrobial effect of surgical masks coated with nanoparticles." <i>J Hosp Infect</i> 62(1): 58-63.                                                                       | Intervention      |
| 73. | Li, C., et al. (2020). "[Management and prevention of common skin problems during epidemic prevention and control of COVID-19]." <i>Nan Fang Yi Ke Da Xue Xue Bao</i> 40(2): 168-170.               | Reported outcomes |
| 74. | Loeb, M., et al. (2009). "Surgical mask vs N95 respirator for preventing influenza among health care workers: a randomized trial." <i>Jama</i> 302(17): 1865-1871.                                  | Reported outcomes |
| 75. | Loibner, M., et al. (2019). "Limiting factors for wearing personal protective equipment (PPE) in a health care environment evaluated in a randomised study." <i>PLoS One</i> 14(1): e0210775.       | Intervention      |
| 76. | Lonroth, E. C. and H. Shahnava (1998). "Adverse health reactions in skin, eyes, and respiratory tract among dental personnel in Sweden." <i>Swed Dent J</i> 22(1): 33-45.                           | Reported outcomes |
| 77. | Lopes, A. C., et al. (2008). "[Adherence to standard precautions by the public pre-hospital health team in Belo Horizonte, Minas Gerais State, Brazil]." <i>Cad Saude Publica</i> 24(6): 1387-1396. | Reported outcomes |
| 78. | Lunding, S., et al. (1998). "[Poor compliance with universal precautions among Danish physicians]." <i>Ugeskr Laeger</i> 160(12): 1789-1793.                                                        | Reported outcomes |
| 79. | Lutz, M., et al. (2019). "Physiological effects of a spit sock." <i>Am J Emerg Med</i> 37(2): 291-293.                                                                                              | Intervention      |
| 80. | Ma, X., et al. (2014). "Knowledge, attitudes and practices relating to influenza A(H7N9) risk among live poultry traders in Guangzhou City, China." <i>BMC Infect Dis</i> 14: 554.                  | Reported outcomes |
| 81. | MacIntyre, C. R., et al. (2016). "Cluster randomised controlled trial to examine medical mask use as source control for people with respiratory illness." <i>BMJ Open</i> 6(12): e012330.           | Reported outcomes |
| 82. | Martins, R. S., et al. (2013). "Adequacy to the use of personal protective equipment in the isolations of emergency." <i>Antimicrobial Resistance and Infection Control</i> 2.                      | Reported outcomes |
| 83. | Maschmeyer, G., et al. (2009). "A prospective, randomised study on the use of well-fitting masks for prevention of invasive aspergillosis in                                                        | Intervention      |

|     |                                                                                                                                                                                                                                                                                     |                   |
|-----|-------------------------------------------------------------------------------------------------------------------------------------------------------------------------------------------------------------------------------------------------------------------------------------|-------------------|
|     | high-risk patients." <i>Ann Oncol</i> 20(9): 1560-1564.                                                                                                                                                                                                                             |                   |
| 84. | Mathews, R., et al. (2008). "Provision and use of personal protective equipment and safety devices in the National Study to Prevent Blood Exposure in Paramedics." <i>Am J Infect Control</i> 36(10): 743-749.                                                                      | Study type        |
| 85. | Mauritzson-Sandberg, E. (1995). "An evaluation of respiratory protective devices used in children's evacuation." <i>Ergonomics</i> 38(4): 707-713.                                                                                                                                  | Purpose of study  |
| 86. | Meyer, J. P., et al. (1997). "Field study of subjective assessment of negative pressure half-masks. Influence of the work conditions on comfort and efficiency." <i>Appl Ergon</i> 28(5-6): 331-338.                                                                                | Purpose of study  |
| 87. | Millqvist, E., et al. (1995). "Prevention of asthma induced by cold air by cellulose-fabric face mask." <i>Allergy</i> 50(3): 221-224.                                                                                                                                              | Reported outcomes |
| 88. | Morishima, M. and K. Kishida (2018). "Understanding attitudes toward hygiene mask use in Japanese daily life by using a repeated cross-sectional survey." <i>Work</i> 61(2): 303-311.                                                                                               | Study type        |
| 89. | Morishima, M., et al. (2011). "An investigation of the use of hay fever masks for the youth." <i>J Hum Ergol (Tokyo)</i> 40(1): 151-156.                                                                                                                                            | Intervention      |
| 90. | Moser, A., et al. (2015). "Rates and determinants of vaccination against seasonal and pandemic influenza in Swiss prehospital emergency medical services workers." <i>Praxis</i> 104: 142.                                                                                          | Study type        |
| 91. | Moser, A., et al. (2016). "Vaccination Against Seasonal or Pandemic Influenza in Emergency Medical Services." <i>Prehosp Disaster Med</i> 31(2): 155-162.                                                                                                                           | Study type        |
| 92. | Motoyama, Y. L., et al. (2016). "Airflow-Restricting Mask Reduces Acute Performance in Resistance Exercise." <i>Sports (Basel)</i> 4(4).                                                                                                                                            | Intervention      |
| 93. | Nichol, K., et al. (2008). "The individual, environmental, and organizational factors that influence nurses' use of facial protection to prevent occupational transmission of communicable respiratory illness in acute care hospitals." <i>Am J Infect Control</i> 36(7): 481-487. | Study type        |
| 94. | Nichol, K., et al. (2013). "Behind the mask: Determinants of nurse's adherence to facial protective equipment." <i>Am J Infect Control</i> 41(1): 8-13.                                                                                                                             | Study type        |
| 95. | Nielsen, R., et al. (1987). "The effect of temperature and humidity levels in a protective mask on user acceptability during exercise." <i>Am Ind Hyg Assoc J</i> 48(7): 639-645.                                                                                                   | Intervention      |



|      |                                                                                                                                                                                                                         |                     |
|------|-------------------------------------------------------------------------------------------------------------------------------------------------------------------------------------------------------------------------|---------------------|
| 96.  | Palmiero, A. J., et al. (2016). "Speech intelligibility assessment of protective facemasks and air-purifying respirators." <i>J Occup Environ Hyg</i> 13(12): 960-968.                                                  | Study type          |
| 97.  | Parveen, S. N. A., et al. (2018). "Identifying acceptable and feasible infection control interventions for nipah encephalitis outbreaks in bangladesh." <i>American Journal of Infection Control</i> 46(6): S24.        | Study type          |
| 98.  | Peponis, T., et al. (2017). "Trauma team utilization of universal precautions: if you see something, say something." <i>Eur J Trauma Emerg Surg</i> 43(1): 145-150.                                                     | Reported outcomes   |
| 99.  | Perez, V., et al. (2012). "Stress, adherence to preventive measures for reducing influenza transmission and influenza-like illness." <i>J Epidemiol Community Health</i> 66(7): 605-610.                                | No extractable data |
| 100. | Radonovich Jr, L. J., et al. (2009). "Diminished speech intelligibility associated with certain types of respirators worn by healthcare workers." <i>Journal of Occupational and Environmental Hygiene</i> 7(1): 63-70. | Intervention        |
| 101. | Radonovich, L., et al. (2018). "Results of the respiratory protection effectiveness clinical trial (respect)." <i>Open Forum Infectious Diseases</i> 5: S51.                                                            | Duplicate           |
| 102. | Ramirez, J. A. and P. T. O'Shaughnessy (2016). "The effect of simulated air conditions on N95 filtering facepiece respirators performance." <i>J Occup Environ Hyg</i> 13(7): 491-500.                                  | Study type          |
| 103. | Raven, P. B., et al. (1977). "Maximal stress test performance while wearing a self-contained breathing apparatus." <i>J Occup Med</i> 19(12): 802-806.                                                                  | Intervention        |
| 104. | Rengasamy, S. and B. C. Eimer (2013). "N95-companion measurement of cout/cin ratios for two n95 filtering facepiece respirators and one surgical mask." <i>J Occup Environ Hyg</i> 10(10): 527-532.                     | Population          |
| 105. | Roberge, R. (2011). "Facemask use by children during infectious disease outbreaks." <i>Biosecur Bioterror</i> 9(3): 225-231.                                                                                            | Study type          |
| 106. | Roberge, R. J., et al. (2010). "Surgical mask placement over N95 filtering facepiece respirators: physiological effects on healthcare workers." <i>Respirology</i> 15(3): 516-521.                                      | Intervention        |
| 107. | Roberge, R. J., et al. (2010). "Reusable elastomeric air-purifying respirators: physiologic impact on health care workers." <i>Am J Infect Control</i> 38(5): 381-386.                                                  | Intervention        |

|      |                                                                                                                                                                                                                                              |                            |
|------|----------------------------------------------------------------------------------------------------------------------------------------------------------------------------------------------------------------------------------------------|----------------------------|
| 108. | Rozzi, T., et al. (2012). "Pilot study of aromatic hydrocarbon adsorption characteristics of disposable filtering facepiece respirators that contain activated carbon." <i>J Occup Environ Hyg</i> 9(11): 624-629.                           | Purpose of study           |
| 109. | van der Sande, M., et al. (2008). "Professional and home-made face masks reduce exposure to respiratory infections among the general population." <i>PLoS ONE</i> 3(7): e2618.                                                               | Reported outcomes          |
| 110. | Santos, P. B., et al. (2013). "Adherence to biosafety practices by nursing staff in the face of situations of occupational risk." <i>Antimicrobial Resistance and Infection Control</i> 2.                                                   | Unable to access full text |
| 111. | Schmitt, C. H. (2004). "Secrets behind the mask." <i>US News World Rep</i> 137(4): 37-41.                                                                                                                                                    | Study type                 |
| 112. | Seliga, R., et al. (1991). "Effect of work load and respirator wear on postural stability, heart rate, and perceived exertion." <i>Am Ind Hyg Assoc J</i> 52(10): 417-422.                                                                   | Intervention               |
| 113. | Seng, M., et al. (2018). "Comfort and exertion while using filtering facepiece respirators with exhalation valve and an active venting system among male military personnel." <i>Singapore Med J</i> 59(6): 327-334.                         | Purpose of study           |
| 114. | Smith, C. L., et al. (2013). "Carbon dioxide rebreathing in respiratory protective devices: influence of speech and work rate in full-face masks." <i>Ergonomics</i> 56(5): 781-790.                                                         | Intervention               |
| 115. | Sokol, K. A., et al. (2016). "Masks for prevention of respiratory viruses on the BMT unit: results of a quality initiative." <i>Transpl Infect Dis</i> 18(6): 965-967.                                                                       | Reported outcomes          |
| 116. | Stebbins, S., et al. (2009). "Using nonpharmaceutical interventions to prevent influenza transmission in elementary school children: parent and teacher perspectives." <i>J Public Health Manag Pract</i> 15(2): 112-117.                    | Reported outcomes          |
| 117. | Stockwell, R. E., et al. (2018). "Prolonged wear of face masks prevents the release of pseudomonas aeruginosa aerosols during coughing in people with cystic fibrosis." <i>Pediatric Pulmonology</i> 53: 269.                                | Unable to access full text |
| 118. | Strauch, A. L., et al. (2016). "Assessing the efficacy of tabs on filtering facepiece respirator straps to increase proper doffing techniques while reducing contact transmission of pathogens." <i>J Occup Environ Hyg</i> 13(10): 794-801. | Intervention               |
| 119. | Sullivan, K. (1993). "Surgical face masks: protection of self or patient?" <i>N Z Dent J</i> 89(398): 137.                                                                                                                                   | Study type                 |

|      |                                                                                                                                                                                                                                     |                            |
|------|-------------------------------------------------------------------------------------------------------------------------------------------------------------------------------------------------------------------------------------|----------------------------|
| 120. | Suruda, A., et al. (2003). "Fatal injuries in the United States involving respirators, 1984-1995." <i>Appl Occup Environ Hyg</i> 18(4): 289-292.                                                                                    | Study type                 |
| 121. | Tak, C. N., et al. (2009). "Preventing healthcare workers from acquiring influenza." <i>Infection Control and Hospital Epidemiology</i> 30(3): 292-295.                                                                             | Reported outcomes          |
| 122. | Tan, K. T. and M. W. Greaves (2004). "N95 acne." <i>Int J Dermatol</i> 43(7): 522-523.                                                                                                                                              | Study type                 |
| 123. | Tang, C. S. and C. Y. Wong (2004). "Factors influencing the wearing of facemasks to prevent the severe acute respiratory syndrome among adult Chinese in Hong Kong." <i>Prev Med</i> 39(6): 1187-1193.                              | Reported outcomes          |
| 124. | Tataris, K., et al. (2010). "Patient attitudes and compliance while wearing surgical masks to prevent disease transmission." <i>Academic Emergency Medicine</i> 17: S58.                                                            | Unable to access full text |
| 125. | Vanjak, D., et al. (2006). "[Cases of pertussis among healthcare workers in a maternity ward: management of a health alert]." <i>Med Mal Infect</i> 36(3): 151-156.                                                                 | Duplicate reference        |
| 126. | Vijaya, K., et al. (2005). "Behaviour of Singaporeans during the SARS outbreak: The impact of anxiety and public satisfaction with media information." <i>International Journal of Health Promotion and Education</i> 43(1): 17-22. | Reported outcomes          |
| 127. | Wong, S. Y., et al. (2012). "Primary care physicians' response to pandemic influenza in Hong Kong: a mixed quantitative and qualitative study." <i>Int J Infect Dis</i> 16(9): e687-691.                                            | Reported outcomes          |
| 128. | Yang, P., et al. (2011). "Mask-wearing and respiratory infection in healthcare workers in Beijing, China." <i>Braz J Infect Dis</i> 15(2): 102-108.                                                                                 | Study type                 |

#### Excluded studies identified from Forward & Backward citation analysis

|      |                                                                                                                                                                                                                                         |              |
|------|-----------------------------------------------------------------------------------------------------------------------------------------------------------------------------------------------------------------------------------------|--------------|
| 129. | Barratt, R., et al. (2019). "Enablers of, and barriers to, optimal glove and mask use for routine care in the emergency department: an ethnographic study of Australian clinicians." <i>Australasian Emergency Care</i> .               | Study type   |
| 130. | Caretti, D. M. and L. C. Strickler (2003). "Speech intelligibility during respirator wear: Influences of respirator speech diaphragm size and background noise." <i>American Industrial Hygiene Association Journal</i> 64(6): 846-850. | Intervention |
| 131. | Chughtai, A. A., et al. (2015). "Practices around the use of masks and                                                                                                                                                                  | Reported     |

|      |                                                                                                                                                                                                                                |                   |
|------|--------------------------------------------------------------------------------------------------------------------------------------------------------------------------------------------------------------------------------|-------------------|
|      | respirators among hospital health care workers in 3 diverse populations." American Journal of Infection Control 43(10): 1116-1118.                                                                                             | outcomes          |
| 132. | Enerson, D. M., et al. (1967). "Heat and moisture trapping beneath surgical face masks: a consideration of factors affecting the surgeon's discomfort and performance." Surgery 62(6): 1007-1016.                              | Reported outcomes |
| 133. | Goh, D. Y. T., et al. (2019). "A randomised clinical trial to evaluate the safety, fit, comfort of a novel N95 mask in children." Scientific Reports 9(1).                                                                     | Purpose of study  |
| 134. | Harber P, Bansal S, Santiago S, et al. Multidomain subjective response to respirator use during simulated work. Journal of Occupational and Environmental Medicine. 2009;51(1):38-45.                                          | Reported outcomes |
| 135. | Harber, P., et al. (2010). "Respirator physiologic impact in persons with mild respiratory disease." Journal of Occupational and Environmental Medicine 52(2): 155-162.                                                        | Intervention      |
| 136. | Harber, P., et al. (2011). "Respirator impact on work task performance." Journal of Occupational and Environmental Medicine 53(1): 22-26.                                                                                      | Reported outcomes |
| 137. | Honarbaksh, M., et al. (2018). "Knowledge, perceptions and practices of healthcare workers regarding the use of respiratory protection equipment at Iran hospitals." Journal of Infection Prevention 19(1): 29-36.             | Reported outcomes |
| 138. | Jacobs, J. L., et al. (2009). "Use of surgical face masks to reduce the incidence of the common cold among health care workers in Japan: A randomized controlled trial." American Journal of Infection Control 37(5): 417-419. | Duplicate         |
| 139. | Jones, J. G. (1991). "The physiological cost of wearing a disposable respirator." American Industrial Hygiene Association Journal 52(6): 219-225.                                                                              | Intervention      |
| 140. | Kim, J. H., et al. (2013). "Pulmonary and heart rate responses to wearing N95 filtering facepiece respirators." American Journal of Infection Control 41(1): 24-27.                                                            | Reported outcomes |
| 141. | Kim, J. H., et al. (2015). "Pressure drop of filtering facepiece respirators: How low should we go?" International Journal of Occupational Medicine and Environmental Health 28(1): 71-80.                                     | Intervention      |
| 142. | Kim, J. H., et al. (2016). "Physiologic and fit factor profiles of N95 and P100 filtering facepiece respirators for use in hot, humid                                                                                          | Reported          |

|      |                                                                                                                                                                                                                            |                     |
|------|----------------------------------------------------------------------------------------------------------------------------------------------------------------------------------------------------------------------------|---------------------|
|      | environments." American Journal of Infection Control 44(2): 194-198.                                                                                                                                                       | outcomes            |
| 143. | Lim, E. C. H., et al. (2007). "Headaches and the N95 face-mask amongst healthcare providers [2]." Acta Neurologica Scandinavica 116(1): 73.                                                                                | Duplicate           |
| 144. | Li Y, Tokura H, Guo YP, et al. Effects of wearing N95 and surgical facemasks on heart rate, thermal stress and subjective sensations. International Archives of Occupational and Environmental Health. 2005;78(6):501-509. | No extractable data |
| 145. | Lin, Y. C. and C. P. Chen (2019). "Thermoregulation and thermal sensation in response to wearing tight-fitting respirators and exercising in hot-and-humid indoor environment." Building and Environment 160.              | Intervention        |
| 146. | Locatelli, S. M., et al. (2014). "Health care workers' reported discomfort while wearing filtering face-piece respirators." Workplace Health and Safety 62(9): 362-368.                                                    | Reported outcomes   |
| 147. | Luximon, Y., et al. (2016). "Time dependent infrared thermographic evaluation of facemasks." Work 54(4): 825-835.                                                                                                          | Reported outcomes   |
| 148. | MacIntyre, C. R., et al. (2014). "Efficacy of face masks and respirators in preventing upper respiratory tract bacterial colonization and co-infection in hospital healthcare workers." Preventive Medicine 62: 1-7.       | Reported outcomes   |
| 149. | MacIntyre, C. R., et al. (2013). "A randomized clinical trial of three options for N95 respirators and medical masks in health workers." American Journal of Respiratory and Critical Care Medicine 187(9): 960-966.       | Duplicate           |
| 150. | Mauritzson-Sandberg, E. V. A. (1991). "Psychological effects on prolonged use of respiratory protective devices in children." Ergonomics 34(3): 313-319.                                                                   | Reported outcomes   |
| 151. | McDiarmid, M., et al. (2020). "N95 Respirators vs Medical Masks in Outpatient Settings." JAMA - Journal of the American Medical Association 323(8): 789.                                                                   | Study type          |
| 152. | Morishima, M., et al. (2014). "Experiences and problems with hygiene masks reported by japanese hay fever sufferers." International Journal of Clothing Science and Technology 26(4): 262-273.                             | Intervention        |
| 153. | Morishima, M., et al. (2017). "Problems related to mask use in hay fever sufferers by repeated surveys." International Journal of Clothing Science and Technology 29(1): 123-134.                                          | Purpose of study    |

|      |                                                                                                                                                                                                                                           |                     |
|------|-------------------------------------------------------------------------------------------------------------------------------------------------------------------------------------------------------------------------------------------|---------------------|
| 154. | Ong, J. J. Y., et al. (2020). "Headaches Associated With Personal Protective Equipment – A Cross-Sectional Study Among Frontline Healthcare Workers During COVID-19." <i>Headache</i> 60(5): 864-877.                                     | Duplicate           |
| 155. | Phin NF, Rylands AJ, Allan J, Edwards C, Enstone JE, Nguyen-Van-Tam JS. Personal protective equipment in an influenza pandemic: a UK simulation exercise. <i>Journal of Hospital Infection</i> . 2009;71(1):15-21.                        | Study design        |
| 156. | Radonovich Jr, L. J., et al. (2010). "Diminished speech intelligibility associated with certain types of respirators worn by healthcare workers." <i>Journal of Occupational and Environmental Hygiene</i> 7(1): 63-70.                   | Intervention        |
| 157. | Radonovich, L. J., et al. (2019). "A tolerability assessment of new respiratory protective devices developed for health care personnel: A randomized simulated clinical study." <i>PLoS ONE</i> 14(1).                                    | No extractable data |
| 158. | Roberge, R., et al. (2012). "Thermal burden of N95 filtering facepiece respirators." <i>Annals of Occupational Hygiene</i> 56(7): 808-814.                                                                                                | Reported outcomes   |
| 159. | Roberge, R. J. (2008). "Effect of surgical masks worn concurrently over N95 filtering facepiece respirators: Extended service life versus increased user burden." <i>Journal of Public Health Management and Practice</i> 14(2): E19-E26. | Study type          |
| 160. | Roberge RJ, Coca A, Williams WJ, Powell JB, Palmiero AJ. Physiological impact of the n95 filtering facepiece respirator on healthcare workers. <i>Respiratory Care</i> . 2010;55(5):569-577.                                              | Intervention        |
| 161. | Roberge, R. J., et al. (2010). "Effect of exhaled moisture on breathing resistance of N95 filtering facepiece respirators." <i>Annals of Occupational Hygiene</i> 54(6): 671-677.                                                         | Study type          |
| 162. | Roberge, R. J., et al. (2012). "N95 filtering facepiece respirator deadspace temperature and humidity." <i>Journal of Occupational and Environmental Hygiene</i> 9(3): 166-171.                                                           | Reported outcomes   |
| 163. | Roberge, R. J., et al. (2013). "Impact of low filter resistances on subjective and physiological responses to filtering facepiece respirators." <i>PLoS ONE</i> 8(12).                                                                    | Intervention        |
| 164. | Roberge RJ, Kim JH, Powell JB. N95 respirator use during advanced pregnancy. <i>American Journal of Infection Control</i> . 2014;42(10):1097-1100.                                                                                        | No extractable data |
| 165. | Sakaguchi, H., et al. (2010). "Maintenance of influenza virus infectivity on the surfaces of personal protective equipment and clothing used in healthcare settings." <i>Environmental Health and Preventive Medicine</i>                 | Purpose of study    |

|      |                                                                                                                                                                                                                                                                             |                     |
|------|-----------------------------------------------------------------------------------------------------------------------------------------------------------------------------------------------------------------------------------------------------------------------------|---------------------|
|      | 15(6): 344-349.                                                                                                                                                                                                                                                             |                     |
| 166. | Shi, J., et al. (2017). "Cardiovascular benefits of wearing particulate-filtering respirators: A randomized crossover trial." <i>Environmental Health Perspectives</i> 125(2): 175-180.                                                                                     | Purpose of study    |
| 167. | Shigayeva, A., et al. (2007). "Factors associated with critical-care healthcare workers' adherence to recommended barrier precautions during the Toronto severe acute respiratory syndrome outbreak." <i>Infection Control and Hospital Epidemiology</i> 28(11): 1275-1283. | No extractable data |
| 168. | Skaria, S. D. and G. C. Smaldone (2014). "Respiratory source Control using surgical masks with nanofiber media." <i>Annals of Occupational Hygiene</i> 58(6): 771-781.                                                                                                      | Purpose of study    |
| 169. | Tamura, E., et al. (2013). "Effect of pharmacists wearing a mask on patient consultation intention." <i>Yakugaku Zasshi</i> 133(6): 737-745.                                                                                                                                | Study type          |
| 170. | Tong, P. S. Y., et al. (2015). "Respiratory consequences of N95-type Mask usage in pregnant healthcare workers-A controlled clinical study." <i>Antimicrobial Resistance and Infection Control</i> 4(1).                                                                    | Intervention        |
| 171. | Turnberg, W., et al. (2009). "Personal healthcare worker (HCW) and work-site characteristics that affect HCWs' use of respiratory-infection control measures in ambulatory healthcare settings." <i>Infection Control and Hospital Epidemiology</i> 30(1): 47-52.           | Reported outcomes   |
| 172. | Wada, K., et al. (2012). "Wearing face masks in public during the influenza season may reflect other positive hygiene practices in Japan." <i>BMC Public Health</i> 12(1).                                                                                                  | Reported outcomes   |
| 173. | Wu, S., et al. (2011). "Anxiety during respirator use: Comparison of two respirator types." <i>Journal of Occupational and Environmental Hygiene</i> 8(3): 123-128.                                                                                                         | Study type          |
| 174. | Yip, W. L., et al. (2005). "The effect of wearing a face mask on body temperature." <i>Hong Kong Journal of Emergency Medicine</i> 12(1): 23-27.                                                                                                                            | Reported outcomes   |
